# Supplementary material
Source: PubMed Central journal article supplement (PMC6463700)
Supplement: supp_RA119.007861_143541_1_supp_290366_pnbqyh.pdf [file supp_RA119.007861_143541_1_supp_290366_pnbqyh.pdf]

## Supplementary Figure 1

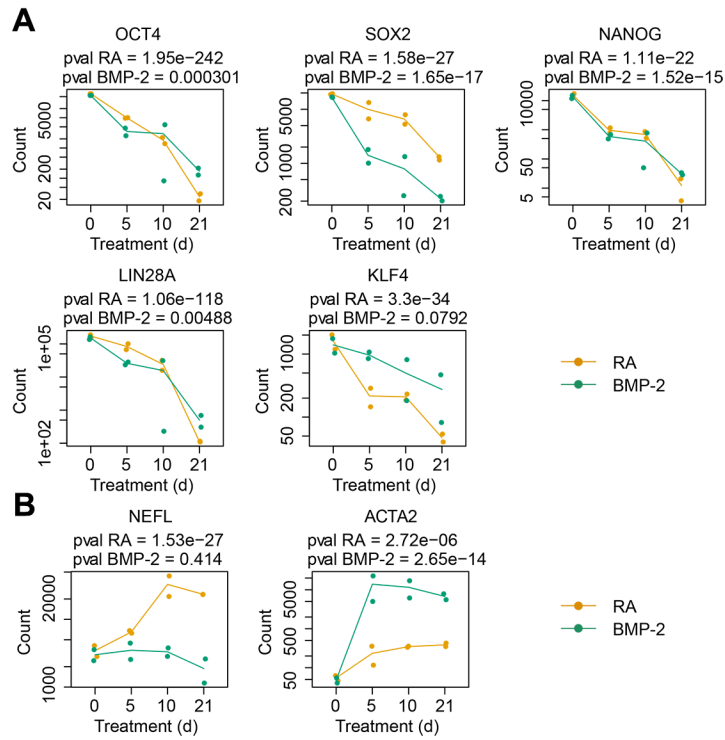

**Supporting Information Fig. S1.** Transcriptional regulation of stem cells markers and lineage-specific genes during differentiation. *A*, Gradual shutdown of OCT4, SOX2, NANOG, LIN28A and KLF4 genes over differentiation of NT2 cells into neurons and muscle cells. *B*, NEFL and ACTA2 genes were upregulated during the neuronal and epithelial differentiation, respectively.

## Supplementary Figure 2

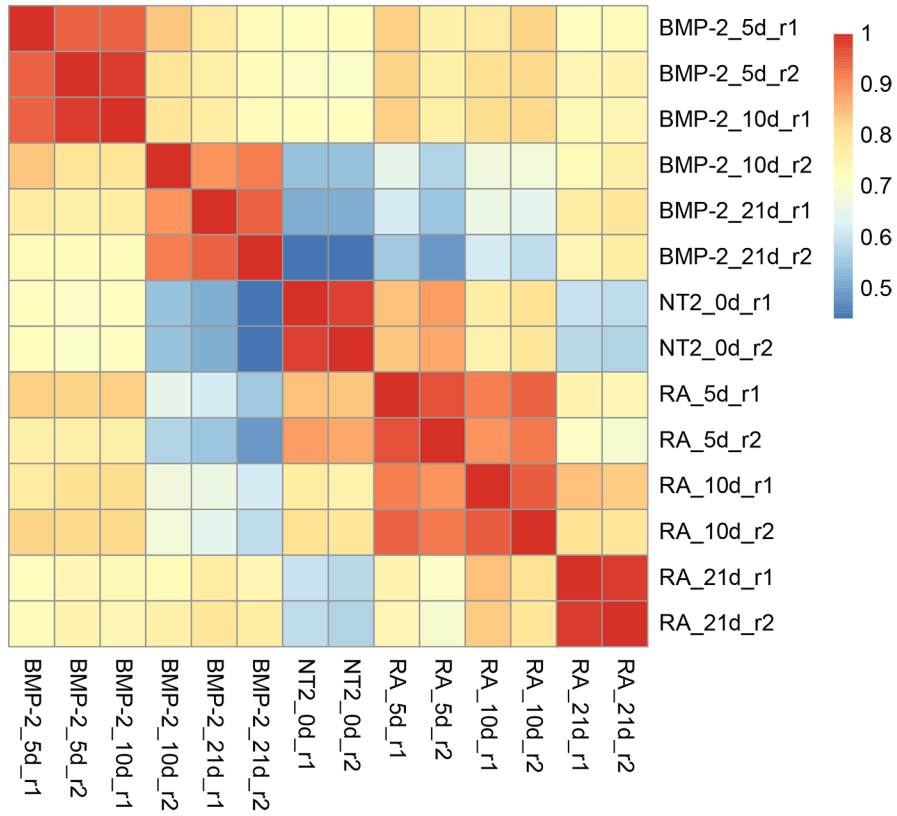

**Supporting Information Fig. S2.** Spearman correlation distance of RNA RPKM from top 2000 highly variable genes.

| sample_name | sample | fastq_name     | treatment | day | replicate | Assigned | Unassigned_Ambiguity_ | Unassigned_NoFeatures | Assigned.p | Unassigned_Ambiguity.p | Unassigned_NoFeatures.p | percent_n on_zero_genes |
|-------------|--------|----------------|-----------|-----|-----------|----------|-----------------------|-----------------------|------------|------------------------|-------------------------|-------------------------|
| BMP-2-5-1   | MD5R1  | MD5R1_1.fq.gz  | BMP-2     | 5   | 1         | 57594587 | 4234163               | 5826192               | 0.851      | 0.063                  | 0.086                   | 0.6456                  |
| BMP-2-5-2   | MD5R2  | MD5R2_1.fq.gz  | BMP-2     | 5   | 2         | 63551060 | 4582833               | 8000563               | 0.835      | 0.06                   | 0.105                   | 0.6786                  |
| BMP-2-10-1  | MD10R1 | MD10R1_1.fq.gz | BMP-2     | 10  | 1         | 57223052 | 4307880               | 5338072               | 0.856      | 0.064                  | 0.08                    | 0.6499                  |
| BMP-2-10-2  | MD10R2 | MD10R2_1.fq.gz | BMP-2     | 10  | 2         | 49066318 | 3500812               | 5578384               | 0.844      | 0.06                   | 0.096                   | 0.644                   |
| BMP-2-21-1  | MD21R1 | MD21R1_1.fq.gz | BMP-2     | 21  | 1         | 52664006 | 3556318               | 6612348               | 0.838      | 0.057                  | 0.105                   | 0.6511                  |
| BMP-2-21-2  | MD21R2 | MD21R2_1.fq.gz | BMP-2     | 21  | 2         | 52318324 | 3430236               | 5395248               | 0.856      | 0.056                  | 0.088                   | 0.6429                  |
| NT2-0-1     | NT2R1  | NT2R1_1.fq.gz  | NT2       | 0   | 1         | 50877250 | 3721760               | 6630658               | 0.831      | 0.061                  | 0.108                   | 0.6467                  |
| NT2-0-2     | NT2R2  | NT2R2_1.fq.gz  | NT2       | 0   | 2         | 76307589 | 5594828               | 9009601               | 0.839      | 0.062                  | 0.099                   | 0.6502                  |
| RA-5-1      | RD5R1  | RD5R1_1.fq.gz  | RA        | 5   | 1         | 49840958 | 3886661               | 4981513               | 0.849      | 0.066                  | 0.085                   | 0.6381                  |
| RA-5-2      | RD5R2  | RD5R2_1.fq.gz  | RA        | 5   | 2         | 67624047 | 5090528               | 8216545               | 0.836      | 0.063                  | 0.102                   | 0.677                   |
| RA-10-1     | RD10R1 | RD10R1_1.fq.gz | RA        | 10  | 1         | 46217247 | 3581885               | 5859242               | 0.83       | 0.064                  | 0.105                   | 0.7059                  |
| RA-10-2     | RD10R2 | RD10R2_1.fq.gz | RA        | 10  | 2         | 61473430 | 4448407               | 9131715               | 0.819      | 0.059                  | 0.122                   | 0.7149                  |
| RA-21-1     | RD21R3 | RD21R3_1.fq.gz | RA        | 21  | 1         | 62268782 | 4840911               | 10494865              | 0.802      | 0.062                  | 0.135                   | 0.7357                  |
| RA-21-2     | RD21R4 | RD21R4_1.fq.gz | RA        | 21  | 2         | 70255788 | 5492259               | 10249361              | 0.817      | 0.064                  | 0.119                   | 0.7235                  |

**Supporting Information Table S1.** Sample information for RNA-seq. The numbers of assigned and unassigned reads, as well as the percentage of genes with non-zero read counts from FeatureCounts, are reported.
